# Supplementary material for: Multiple sgRNAs with overlapping sequences enhance CRISPR/Cas9-mediated knock-in efficiency
Source: PubMed Central journal article supplement — Exp Mol Med. 2018 Apr 6;50(4):16. doi: 10.1038/s12276-018-0037-x (PMC5938013; doi:10.1038/s12276-018-0037-x), 2018-04-06
Supplement: 12276_2018_37_MOESM1_ESM.pdf [file 12276_2018_37_MOESM1_ESM.pdf]

1 **Supplementary information for**

2

3

4 **Multiple sgRNAs with overlapping sequences enhance CRISPR/Cas9-mediated knock-in efficiency**

5

6

7 **Authors**

8 Da Eun Jang<sup>1</sup>, Jae Young Lee<sup>2</sup>, Jae Hoon Lee<sup>3</sup>, Ok Jae Koo<sup>2</sup>, Hee Sook Bae<sup>2</sup>, Min Hee Jung<sup>2</sup>, Ji Hyun Bae<sup>4</sup>,

9 Woo Sung Hwang<sup>4</sup>, Yoo Jin Chang<sup>1</sup>, Yoon Hoo Lee<sup>1</sup>, Han Woong Lee<sup>4,\*</sup>, Su Cheong Yeom<sup>1,\*</sup>

10

11 Corresponding authors. E-mail: [scyeom@snu.ac.kr](mailto:scyeom@snu.ac.kr), [hwl@yonsei.ac.kr](mailto:hwl@yonsei.ac.kr)

12

13

14

15

16 **This file includes**

17

18 1. Figure S1~S2: Schematic for experiment, sequence information of ssODN and sgRNAs, and result for  
19 genotyping.

20 2. Table S1~S2: ssODN and primer sequences used in this study

21

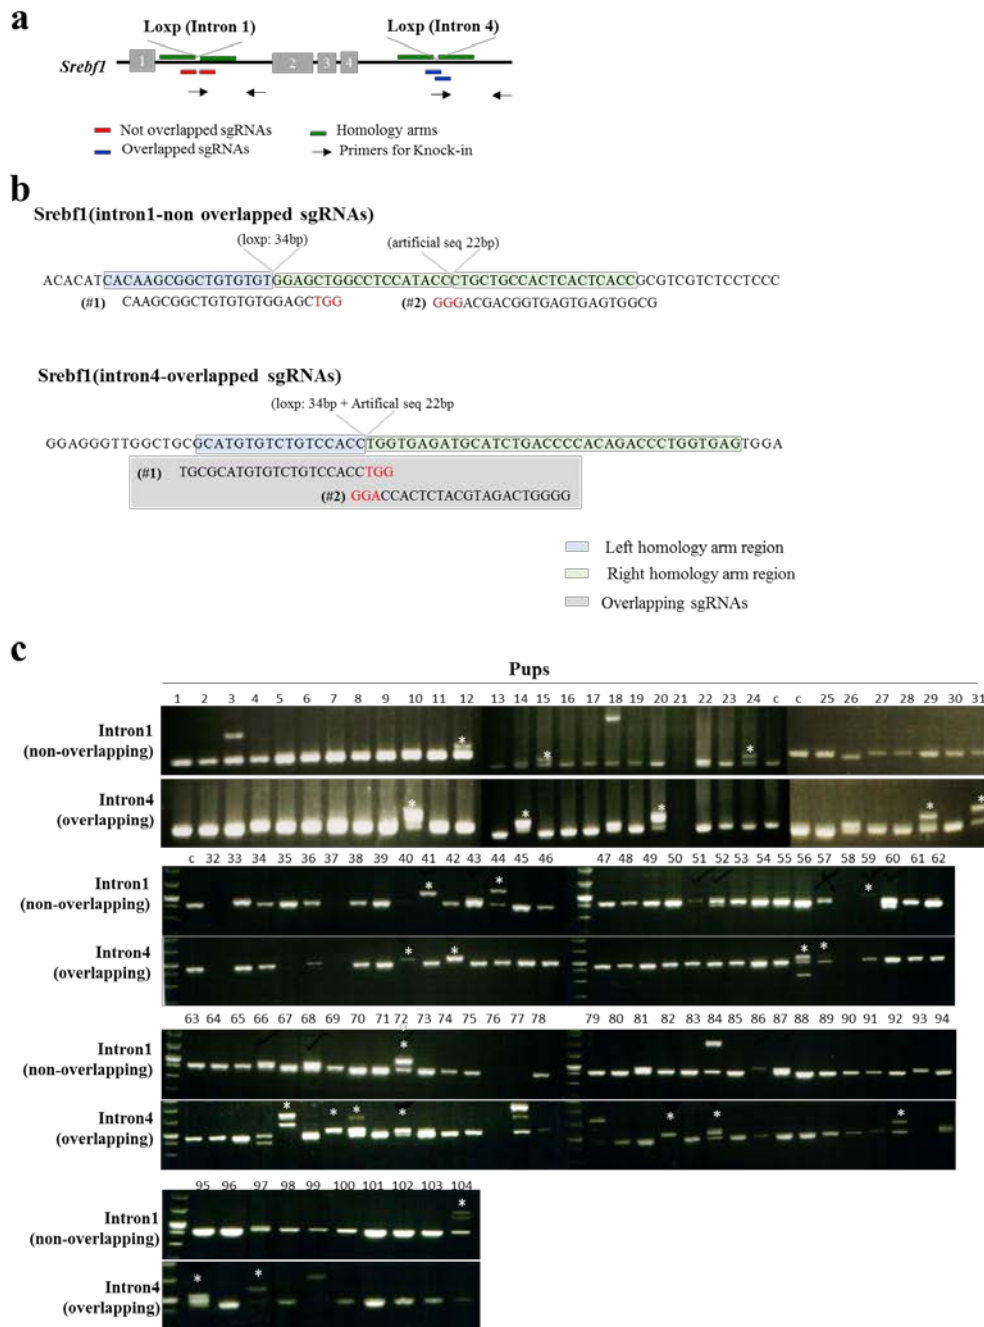

1

2

3 **Figure S1. loxP sequence KI in zygotes with non-overlapping or overlapping sgRNAs into intron 1 or 4, respectively**4 **of the mouse *srebf1* locus. (a)** A schematic diagram of the strategy for KI loxP sequence with ssODN consisting of

5 homology arms and loxP into either intron 1 or intron 4 with non-overlapping or overlapping sgRNAs respectively to the

6 mouse *Srebf1* locus. Non-overlapping sgRNAs targeting intron 1 were indicated as red bars, overlapping sgRNAs targeting

7 intron 4 were indicated as blue bars and the position of primer sets for KI analysis (black arrows) were shown. (b) Non-

8 overlapping and overlapping sgRNA sequences targeting intron 1 or 4 and their PAM (red letters). (c) Genotyping results of

9 pups microinjected with non-overlapping or overlapping sgRNAs targeting intron 1 or 4 respectively of mouse *Srebf1* locus,

10 Cas9-mRNA and ssODN by PCR with specific primers (see Table 1). \* indicates KI.

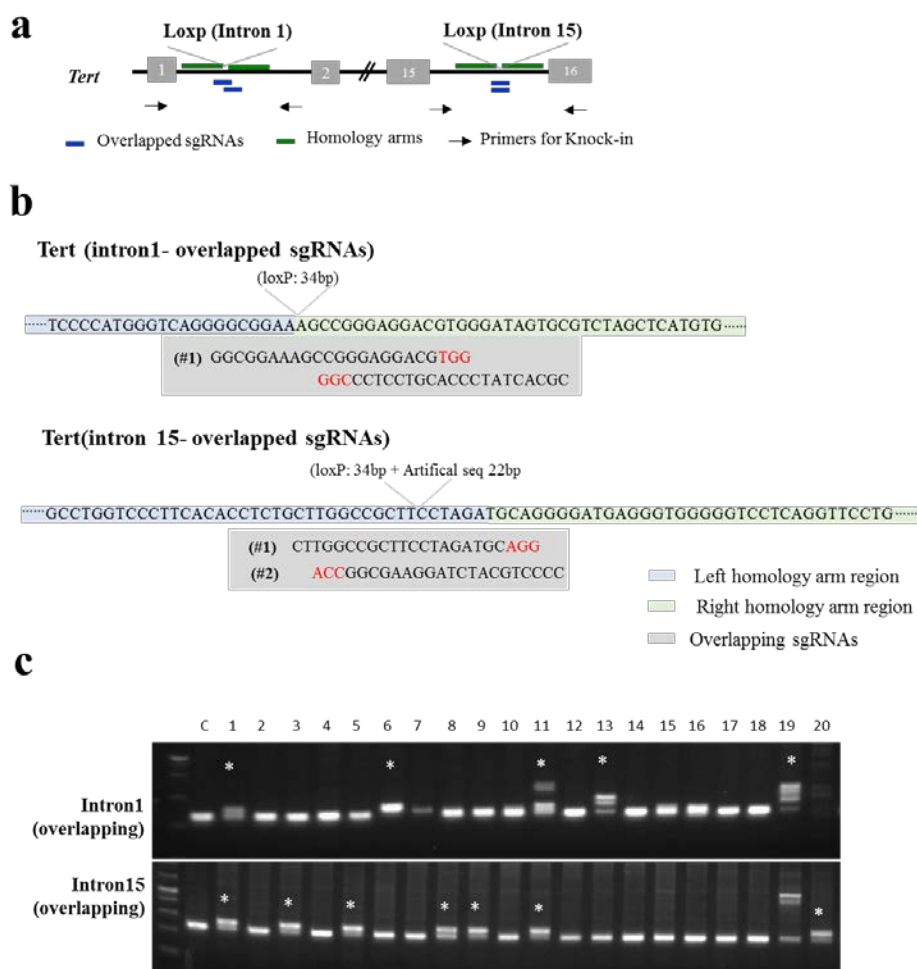

**Figure S2. loxP sequence KI in zygotes with overlapping sgRNAs into intron 1 and 15 of the mouse *tert* locus.** (a) A schematic diagram of the strategy for KI loxP sequence with ssODN consisting of homology arms and loxP into either intron 1 or intron 15 with overlapping sgRNAs at the mouse *Tert* locus. Overlapping sgRNAs targeting intron 1 and 15 of the mouse *tert* locus were indicated as blue bars and the position of primer sets for KI analysis (black arrows) were shown. (b) Overlapping sgRNA sequences targeting intron 1 or 15 and their PAM (red letters). (c) Genotyping results of pups microinjected with overlapping sgRNAs targeting intron 1 or 15 of the mouse *Tert* locus, Cas9-mRNA and ssODN by PCR with specific primers (see Table 1). \* indicates KI.

1  
2  
3  
4  
5  
6  
7  
8  
9  
10  
11

1 **Table S1. ssODN used in this study.**

2

| Primer name              | ssODN                                                                             | PCR size (bp)                              |
|--------------------------|-----------------------------------------------------------------------------------|--------------------------------------------|
| <i>Rosa26</i>            | GGACCGCCCTGGGCCTGGGAGAATCCCTTCCCCCTCTCCCTCGT                                      | homology arm (45 nt)                       |
|                          | ATAACTTCGTATAATGTATGCTATACGAAGTTAT                                                | loxP (34 nt)                               |
|                          | TTCGAATTCTGCAGTCGACGGTACCGCGGGCCCGGATCCAT                                         | Multiple cloning site (42 nt)              |
|                          | ATAACTTCGTATAGGATACTTTATACGAAGTTAT                                                | loxP (34 nt)                               |
|                          | GATCTGCAACTCCAGTCTTTCTAGAAGATGGGCGGGAGTCTTCTG                                     | homology arm (45 nt),                      |
| <i>Upf1</i> (intron 1)   | GCTACTTCTAGGCTCCTGAAGAACCCGGTGGCTAAGTGTGGGTGGA                                    | homology arm (48 nt)                       |
|                          | TGCTGACTTAGTGCTCTATAGCTGAAG                                                       | homology arm with mutation in PAM sequence |
|                          | ATAACTTCGTATAGCATACATTATACGAAGTTAT                                                | loxP (34 nt)                               |
|                          | TTCCTGGGGTGATGATTAAAGCTGTGCATACTCAGGCTAGTCAGG                                     | homology arm with mutation in PAM sequence |
|                          | TCTCTGTGGTGGGACTTCAGTGCAGACATCCTATGCTGTGACTTTGAG                                  | homology arm (48 nt) with 3' end           |
| <i>Srebf1</i> (intron 1) | AGCGGCTGTGTGT                                                                     | homology arm (13 nt)                       |
|                          | ATAACTTCGTATAATGTATGCTATACGAAGTTAT                                                | loxP (34 nt)                               |
|                          | GGAGCTGGCCTCCATAACC                                                               | homology arm (18 nt)                       |
|                          | CGTCGCCGTCAGCTCGACCAG                                                             | artificial sequence to screen (22nt)       |
|                          | CTGCTGCCACTCACTCACC                                                               | homology arm (19nt)                        |
| <i>Srebf1</i> (intron 4) | GGTTGGCTGCGCATGTGTCTGTCCACC                                                       | homology arm (27 nt)                       |
|                          | ATAACTTCGTATAATGTATGCTATACGAAGTTATTGGCACGAACTCCAGCAGGACCATG                       | loxP and artificial sequence (59 nt)       |
|                          | TGAGATGCATCTGACCCACAGACCCTGGTGAG                                                  | homology arm (33 nt)                       |
| <i>Tert</i> (intron 1)   | GGGGCTCACAGCCTCCACCTGCCGACCTTTCCTTCCACCAGGTGGGCCTCCAGGCGGGATCCCCATGGGTCAGGGGCGGAA | homology arm (80 nt)                       |
|                          | ATAACTTCGTATAATGTATGCTATACGAAGTTAT                                                | loxP (34 nt)                               |
|                          | AGCCGGGAGGACGTGGGATAGTGCCTAGCTCATGTGTCAAGACCCTTCTCCTTACCAGGTGCATCCCTGAAAGA        | homology arm (79 nt)                       |

|                                     |                                                                                  |                                     |
|-------------------------------------|----------------------------------------------------------------------------------|-------------------------------------|
| <i>Tert</i> (intron 15)             | AGCCGGGAGGACGTGGGATAGTGCGTCTAGCTCATGTGTCAAGACCCTCTTCTCCTTACCAGGTGTCATCCCTGAAAGA  | homology arm (79 nt)                |
|                                     | TAATTCGTATAGCATAACATTATACGAAGTTATA                                               | loxP sequence (34 nt)               |
|                                     | TGCAGGGGATGAGGGTGGGGTCCCTCAGGTTCCCTGTCTTGCTTCTGTTTCCAGATTGTCAAGCTTGAGGTCTTTGTGTG | homology arm (79 nt)                |
| <i>Morc2a</i>                       | TGAGAAAGTAATGCTATTTTTTTTCCCTCTTGTTAACCATTTGAGGTGAT                               | homology arm (50 nt)                |
|                                     | GCTGCTAGTGTGATACAATTTGGGAAAT(T)AGCGAAGAGGACGCCTGAATCGACTCAAATTTGGGCA             | insert with silent mutation (65 nt) |
|                                     | GTATGGCAATGGATTAATAATCGTACGTATATTGGAAGCCTAGCATAGGGC                              | homology arm (50 nt)                |
| <i>Adora2b</i><br>(overlapping)     | CTCTTCCATCCAGCCCTGGCCAAGGACAAGCCCAAGTGGGTGATGAATGTGGCCATCCTCCTGTC                | homology arm (65 nt)                |
|                                     | ACATGCCAATTCGTGGTCAACCCGATCGTATATGCGTACCGTAACCGTGGCTTCC                          | insert with silent mutation (56 nt) |
|                                     | GCTACAGTTTCCACAAGATCATCTCCAGATATGTTCTCTGCCAGGCCGAGACCAAGGGTGGGAGT                | homology arm (65 nt)                |
| <i>Adora2b</i><br>(non-overlapping) | AATGTGGCCATCCTCCTGTCACATGCCAATTCAGTTGTCAACCCATTGTCTATGCCTACAGGAA                 | homology arm (65 nt)                |
|                                     | CCGAGGCTTCCGCTACTCCCTCCACAAATATAAGTCGGTATGTGTTATGCCAAGCCGAACCAAAAGGT             | insert with silent mutation (70 nt) |
|                                     | GGGAGTGGGCAGGCTGGGGCGCAGTCTACTCTCAGTCTGGGCTTATGACCTAGGCTCTGGCCTTT                | homology arm (65 nt)                |

1

2

3

1 **Table S2. Primers used for HDR analysis.**

2

| Primer name              | Forward                                             | Reverse                                               | PCR size (bp) |
|--------------------------|-----------------------------------------------------|-------------------------------------------------------|---------------|
| <i>Rosa26</i>            | CTCTCCCAAAGTCGCTCT                                  | ACTACCTATCCTCCCATTTTCC                                | 495           |
| <i>Upf1</i> (intron 1)   | TTGGGGGGATGCTGACTT                                  | AGGTTGTGCCTTATGGTGAG                                  | 237           |
| <i>Upf1</i> -deep seq    | ACACTCTTCCCTACACGACGCTCTCCGATCTAGGTTGTGCCTTATGGTGAG | GTGACTGGAGTTCAGACGTGTGCTCTCCGATCTAGGAGGTGTCTGCTCCTATC | 250           |
| <i>Upf1</i> (intron 2)   | CACACACACCCAGCAA                                    | GGTGGAAAGGACGACTAGG                                   | 272           |
| <i>Morc2a</i>            | TGTGTTTGCCAGGCTTGT                                  | GGCGTCCTCTCGTAAT                                      | 393           |
| <i>Morc2a</i> -deep seq  | ACACTCTTCCCTACACGACGCTCTCCGATCTTGGTGTACAGCCATGCTTG  | GTGACTGGAGTTCAGACGTGTGCTCTCCGATCTAGCAAGAATCCACCATCTG  | 253           |
| <i>Srebf1</i> (intron 1) | GTGTGCTATGCTGGGGATGT                                | GCTCTCAGGAGAGTTGGCAC                                  | 355           |
| <i>Srebf1</i> (intron 4) | CAGACTCACTGCTGCTGACA                                | ACCGGTAGCGCTTCTCAATG                                  | 368           |
| <i>Tert</i> (intron 1)   | GCCCAATGCCTAGTGTC                                   | GCACGTTTCTCTCGTTGCG                                   | 272           |
| <i>Tert</i> (intron 15)  | CACTCAAGATCCCTGCCTGG                                | CCTTAGCCTGCTTGGGTCAA                                  | 269           |
| <i>Adora2b</i>           | AGGACAAGCCCAAGTGGGTG                                | CCTAGGTCATAAGCCCAGAC                                  | 212           |

3

4
